# Supplementary material
Source: PubMed Central journal article supplement (PMC7334448)
Supplement: pnas.1920049117.sapp.pdf [file pnas.1920049117.sapp.pdf]

Supplementary Information for

## **Telomere shortening produces an inflammatory environment that increases tumor incidence in zebrafish**

Kirsten Lex<sup>1\*</sup>, Mariana Maia Gil<sup>1\*</sup>, Bruno Lopes-Bastos<sup>1,3</sup>, Margarida Figueira<sup>1</sup>, Marta Marzullo<sup>1</sup>, Kety Giannetti<sup>1</sup>, Tânia Carvalho<sup>2</sup> and Miguel Godinho Ferreira<sup>1,3</sup>

<sup>1</sup> Instituto Gulbenkian de Ciência, 2781-901 Oeiras, Portugal

<sup>2</sup> Histology and Comparative Pathology Laboratory, Instituto de Medicina Molecular, 1649-028 Lisbon, Portugal

<sup>3</sup> Institute for Research on Cancer and Aging of Nice (IRCAN), INSERM U1081 UMR7284 CNRS, 06107 Nice, France.

\* These authors contribute equally in this work

Corresponding Author: Miguel Godinho Ferreira  
Email: Miguel-Godinho.FERREIRA@unice.fr

**This PDF file includes:**

Figures S1 and S2  
Table S1

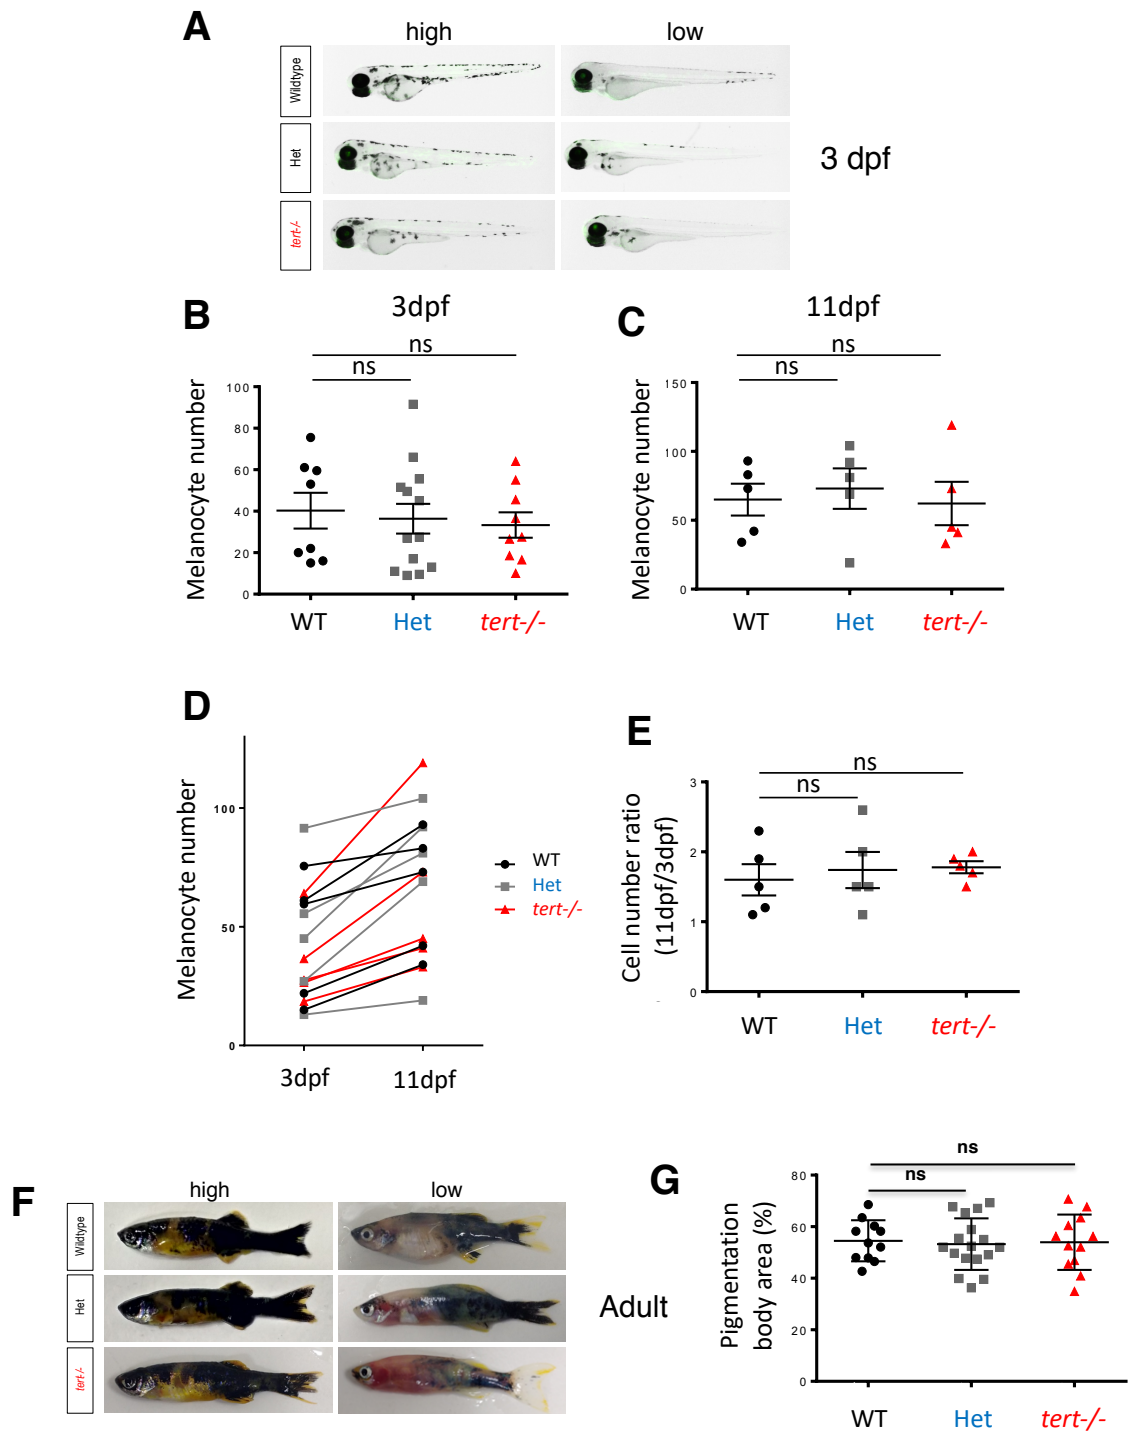

**Supplementary Figure 1. *tert* genetic status of chimera recipients does not influence melanocyte number in larvae or adults.** A) Representative images of 3dpf chimeras

exhibiting high (left) and low (right) number of melanocytes. Blastula *mitfa:HRAS*;  $\beta$ -actin:GFP cells were injected into the same stage embryos resulting from an incross of *tert*<sup>+/-</sup>; Casper. Larvae were genotyped at 3dpf and followed individually until 11dpf. B and C) No significant differences between melanocyte numbers in hosts of different *tert* genotype, both at 3dpf and 11dpf. Each point in the graph represents an individual animal. Data are represented as mean  $\pm$  SEM. D) Melanocyte proliferation for individual animals represented between 2 timepoints was not significantly influenced by host genotype. E) Cell proliferation in individual animals, represented as the ratio of cell numbers between the 2 timepoints was not significantly altered by host genotype. F) Chimeras harboring a tumor were analyzed for extent of pigmentation in adults. Left side animals with high pigmentation, right side: low pigmentation. G) Quantification of pigmented area in percent of total surface. Each datapoint represents one animal (both sides). Pigmented area did not significantly differ depending on the host genotype. Data are represented as mean  $\pm$  SEM. ns: not significant.

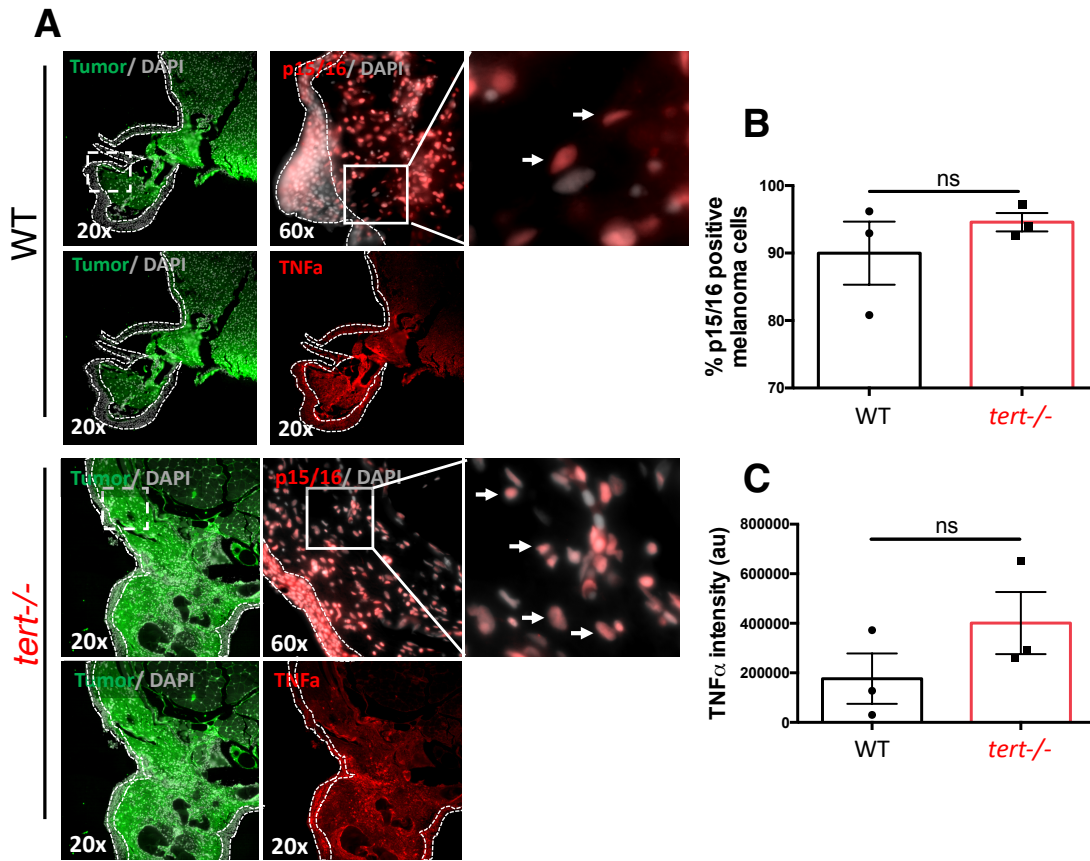

**Supplementary Figure 2: The level of senescence and TNF $\alpha$  appears to be similar in melanoma of wildtype and *tert*<sup>-/-</sup> chimeras.** A) Representative immunofluorescence images of p15/16 and TNF $\alpha$  in melanoma from wildtype and telomerase mutant chimeras. Dashed lines locate the skin (no green fluorescence) and arrows indicate p15/16 positive cells. B) Quantification of p15/16 positive cells and levels of TNF $\alpha$  in melanoma of chimeric wildtype and *tert*<sup>-/-</sup> zebrafish (N=3). Squares with dashed lines show place of amplification in a sequential section and squares with solid lines show place of amplification on that section. Data are represented as mean  $\pm$  SEM. ns: not significant.

**Table S1 – List of primers used in RT-qPCR expression analysis and *tert* genotyping.**

| Gene name       | Primer sequences                                                                |
|-----------------|---------------------------------------------------------------------------------|
| <i>cdkn2a/b</i> | forward – 5' GGATGAACTGACCACAGCAGCA 3'<br>reverse – 5' CGGCTGCGGAAAGAGTCTCAG 3' |
| <i>cdkn1a</i>   | forward – 5' ATGCAGCTCCAGACAGATGA 3'<br>reverse – 5' CGCAAACAGACCAACATCAC 3'    |
| <i>tnfa</i>     | forward – 5' AGGCAATTTCACTTCCAAGGC 3'<br>reverse – 5' GGTCTTGGTCATCTCTCCAGT 3'  |
| <i>rpl13</i>    | forward – 5' TTCACCACCACAGCCGAAAGA 3'<br>reverse – 5' TACCGCAAGATTCCATACCCA 3'  |
